# Supplementary material for: The Emotional Experience of Mexican Women with SARS-CoV-2 during Pregnancy―A Qualitative Study
Source: MDPI journal article supplement (doi:10.3390/healthcare11202785), 2023-10-21
Supplement: s1 [file s1]

**Table S1. Interview Guide**

| <b>Themes</b>                       | <b>Questions</b>                                               | <b>Matters to explore</b>                                                                                                                                                                                                                                                                                                                                                                                                                             |
|-------------------------------------|----------------------------------------------------------------|-------------------------------------------------------------------------------------------------------------------------------------------------------------------------------------------------------------------------------------------------------------------------------------------------------------------------------------------------------------------------------------------------------------------------------------------------------|
| 1. Maternal health before pregnancy | How was your health before getting pregnant?                   | <ul style="list-style-type: none"> <li>• Overall health</li> <li>• Healthcare</li> <li>• Eating habits, exercise, previous consumption of cigarettes, alcohol, and/or other substances; emotional state before pregnancy</li> </ul>                                                                                                                                                                                                                   |
| 2. Pregnancy before COVID-19        | How were you experiencing your pregnancy before the disease?   | <ul style="list-style-type: none"> <li>• Symptoms and pregnancy planning; reaction of the woman, her partner and her family to the pregnancy</li> <li>• Diagnosis of obstetrical complications; medical care</li> <li>• Mood</li> <li>• Relatives sick with COVID-19; relatives who died because of the disease</li> <li>• Expectations towards pregnancy; changes experienced</li> </ul>                                                             |
| 3. Diagnosis of COVID-19            | What was your experience like when getting sick with COVID-19? | <ul style="list-style-type: none"> <li>• Number of weeks pregnant when getting infected</li> <li>• Information about the disease</li> <li>• Symptoms and diagnosis of the disease</li> <li>• Treatment</li> <li>• Experiences and emotions towards the disease</li> <li>• Isolation and social support</li> <li>• Medical care</li> <li>• Experience of the disease in relatives</li> <li>• Experience of quarantine</li> </ul>                       |
| 4. Pregnancy after COVID-19         | How did you experience your pregnancy after the disease?       | <ul style="list-style-type: none"> <li>• Special care</li> <li>• Recovery from COVID-19</li> <li>• Mood</li> <li>• Support received</li> </ul>                                                                                                                                                                                                                                                                                                        |
| 5. Pregnancy resolution             | How did you experience the resolution of your pregnancy?       | <ul style="list-style-type: none"> <li>• Type of pregnancy resolution</li> <li>• Experience during pregnancy resolution</li> <li>• Perception of medical care</li> <li>• Complications</li> <li>• Emotions during pregnancy resolution; mood</li> <li>• Support from family and staff</li> <li>• Hospital stay: experience and care</li> <li>• Recovery</li> <li>• Communication and information on the baby</li> <li>• Hospital discharge</li> </ul> |
| 6. Postpartum                       | What was your postpartum experience?                           | <ul style="list-style-type: none"> <li>• Going back home</li> <li>• Care for the baby</li> </ul>                                                                                                                                                                                                                                                                                                                                                      |

- 
- Extension of isolation
  - Support from family and others
  - Medical care
  - Special care
  - Mood
  - Life changes caused by COVID-19 and the new baby
-
